# Supplementary material for: Biosensor libraries harness large classes of binding domains for construction of allosteric transcriptional regulators
Source: PubMed Central journal article supplement (PMC6079105; doi:10.1038/s41467-018-05525-6), 2018-08-06
Supplement: 41467_2018_5525_MOESM3_ESM.pdf [file 41467_2018_5525_MOESM3_ESM.pdf]

## **Description of Additional Supplementary Files**

File Name: Supplementary Data 1

Description: A list of the main plasmids and bacterial strains used in this work

File Name: Supplementary Data 2

Description: All the oligonucleotides mentioned in the manuscript

File Name: Supplementary Data 3

Description: The collection of synthetic reporter promoters referred to in this paper
